# Supplementary material
Source: PubMed Central journal article supplement (PMC7691283)
Supplement: mmc1.pdf [file mmc1.pdf]

SUPPLEMENTAL MATERIAL

**Supplementary Figure 1. Principle component analysis (PCA) of genes of interest pre and post ComBat-Seq normalization.** PCA plots for all organs (A) and cells (B) pre and post ComBat-Seq normalization were generated.

**(A) Tissues**

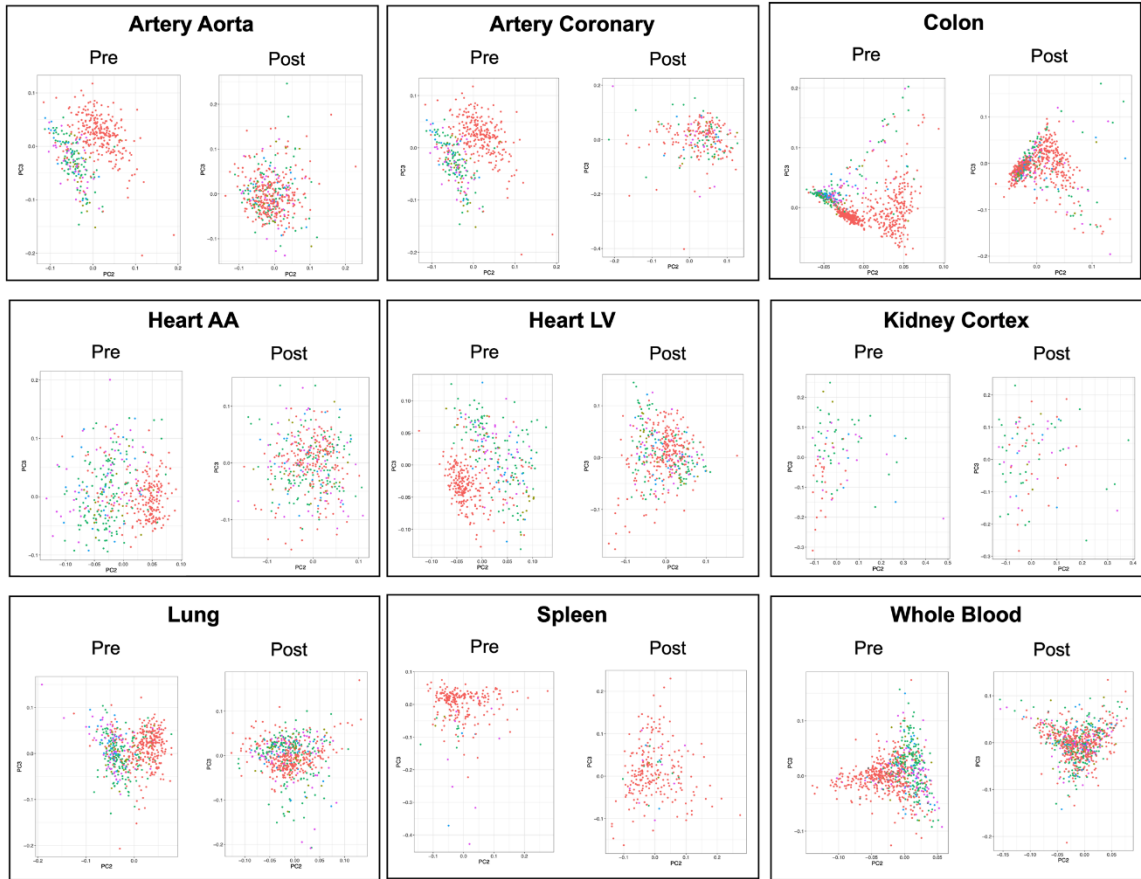

**(B) Cells**

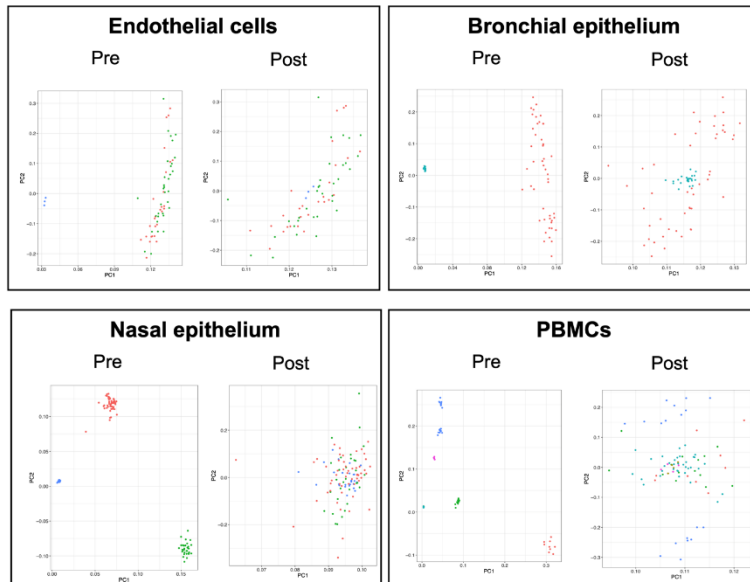

**Supplementary Figure 1**

**Supplementary Figure 2. The effect of age on *FURIN*, *PP1PB*, *CTSL*, *ACE* or *ADAM17* in aorta, heart left ventricle (heartLV) or whole blood**

Gene expression levels in aorta, heart left ventricle and whole blood were analyzed based on adults under 40 years (<40) versus over 40 years (≥40). Data were analyzed using an unpaired Mann-Whitney T-test (**A, C, E, G and I**). Correlations with age were determined using Spearman's correlation test analysis (**B, D, F, H and J**). Data were expressed as individual data points and median +/- interquartile range (Q1, Q3); significance was accepted when \*p<0.05.

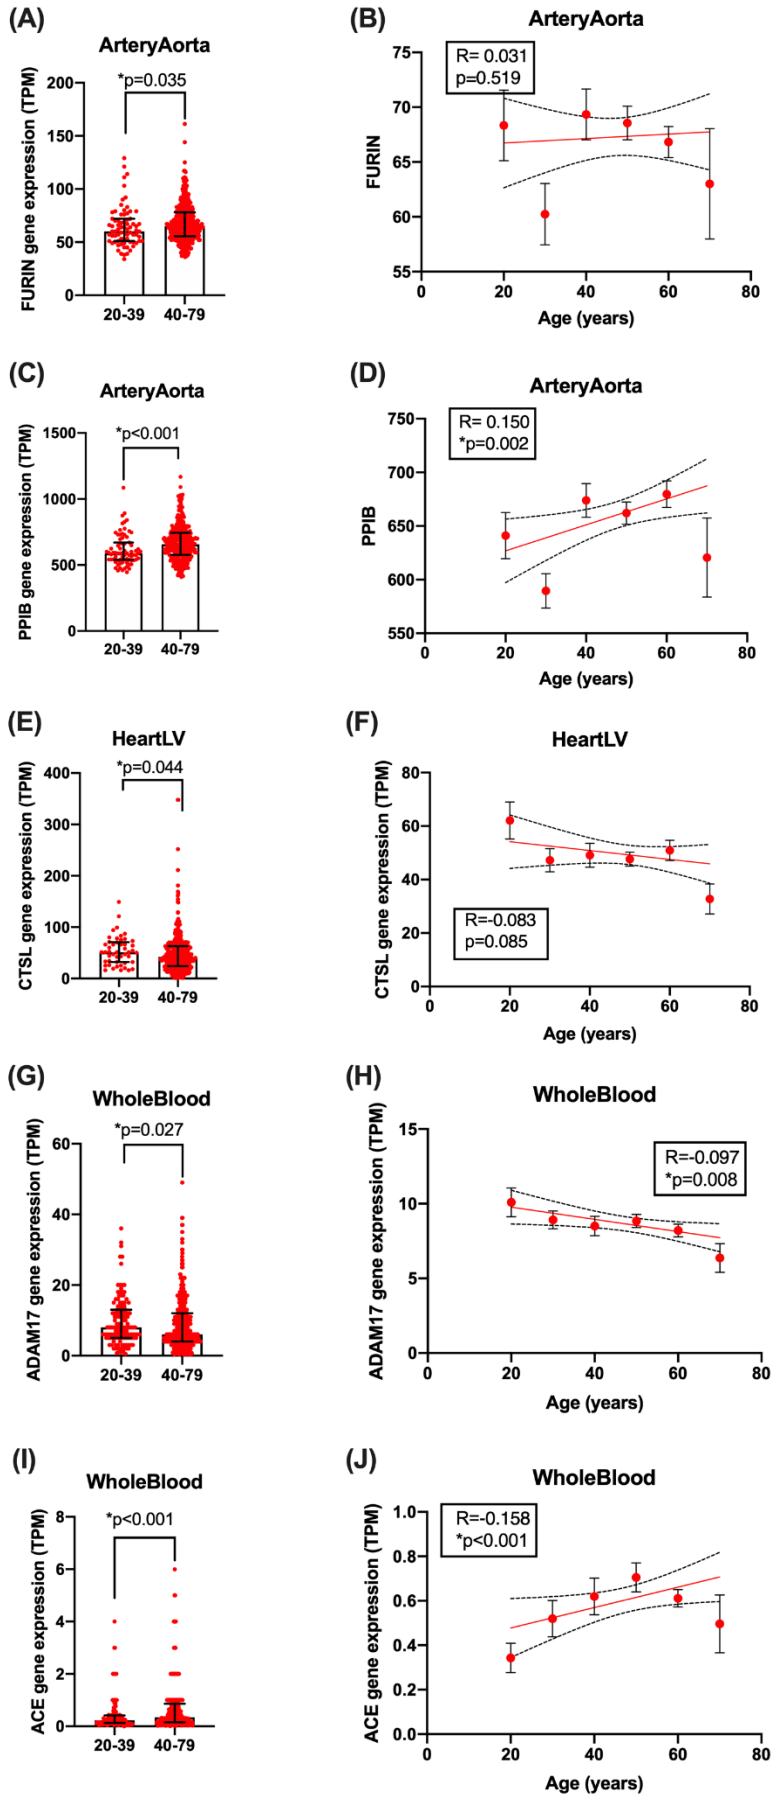

Supplementary Figure 2

**Supplementary Figure 3. The effect of age on *ADAM17*, *TMPRSS2*, *CTSL* or *PPIA* in colon or lung**

Gene expression levels in lung were analyzed in adults under 40 years (<40) versus over 40 years (≥40) using an unpaired Mann-Whitney T-test (**A, C, E, G**) and correlations with age determined using Spearman's correlation test analysis (**B, D, F, H**). Data were expressed as individual data points and median +/- interquartile range (Q1, Q3) (**A, C, E, G**) or mean +/- SEM (**B, D, F, H**); significance was accepted when \*p<0.05.

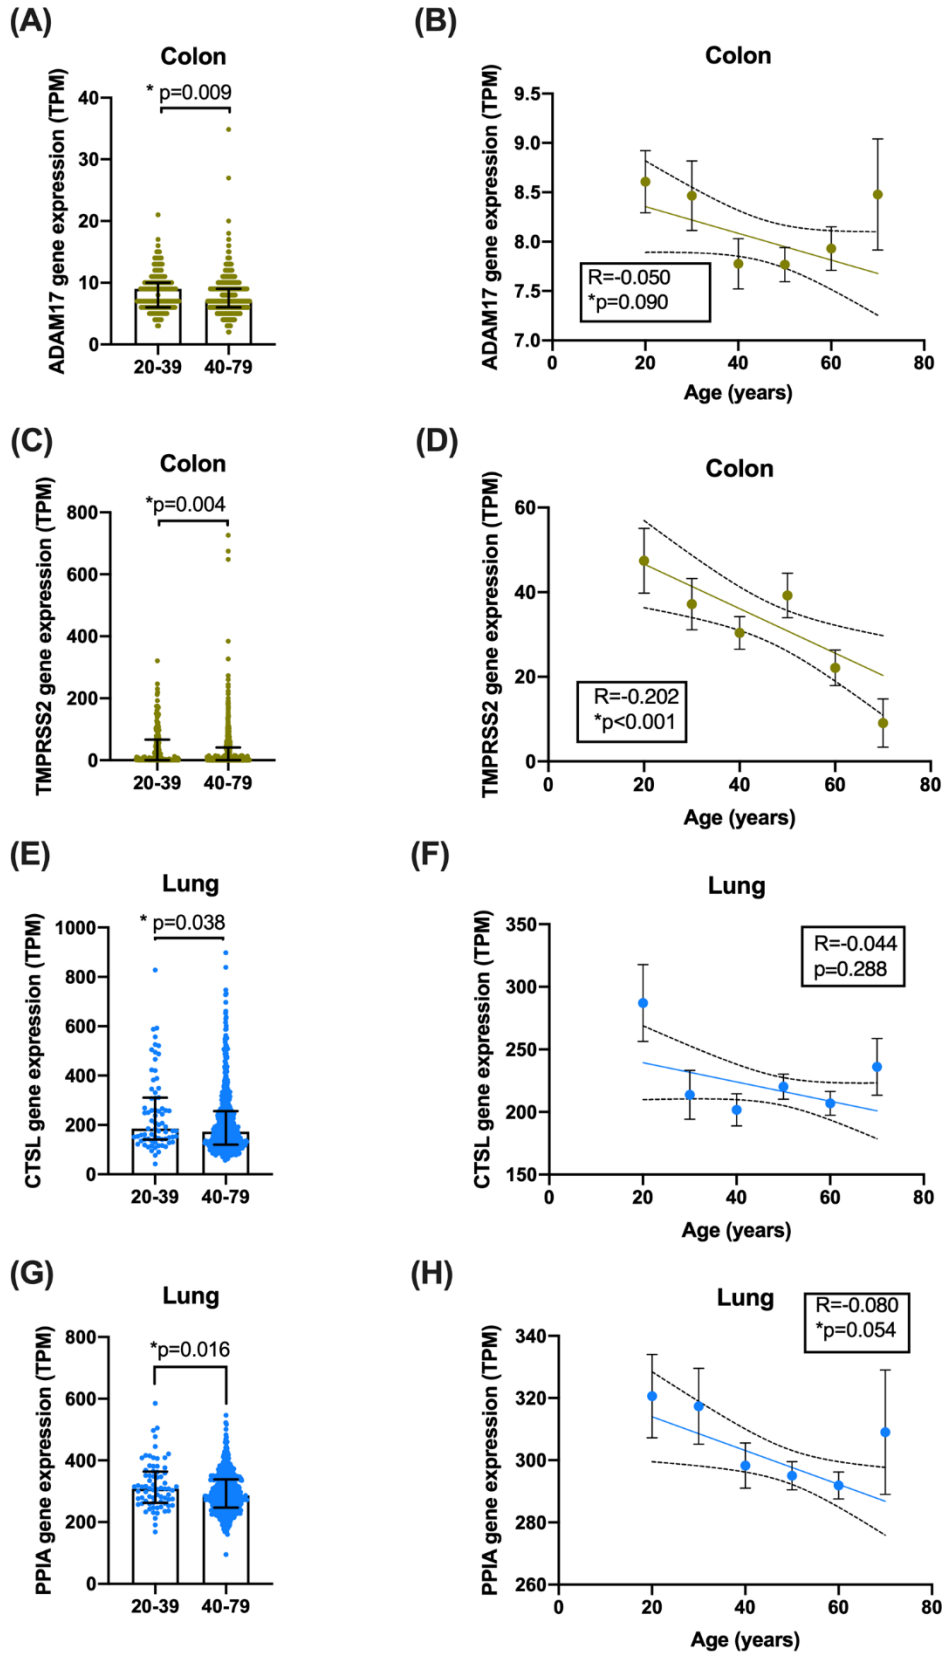

Supplementary Figure 3

#### Supplementary Figure 4. Correlation analysis of ACE expression in nasal epithelial cells with age

Data are shown as individual points for ACE expression levels and age (years). Data were expressed as individual points and were analyzed using Pearson's correlation analysis.

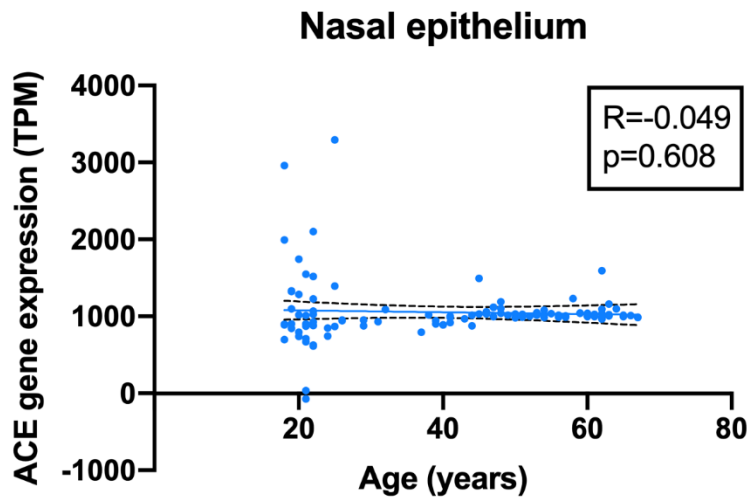

#### Supplementary Figure 4

Supplementary Figure 5. The effect of gender on endothelial cells, bronchial and nasal epithelium, heart appendage (heartAA), heart left ventricle (heartLV), whole blood and coronary artery. Gene expression levels in cells and tissues were analyzed in males and females using an unpaired Student's t-test (A, B, C, D, F) or Mann-Whitney T-test (G, H, I, J, K). Data were expressed as individual data points and mean +/- SEM (A, B, C, D, F) or median +/- interquartile range (Q1, Q3) (G, H, I, J, K); significance was accepted when \* $p < 0.05$ .

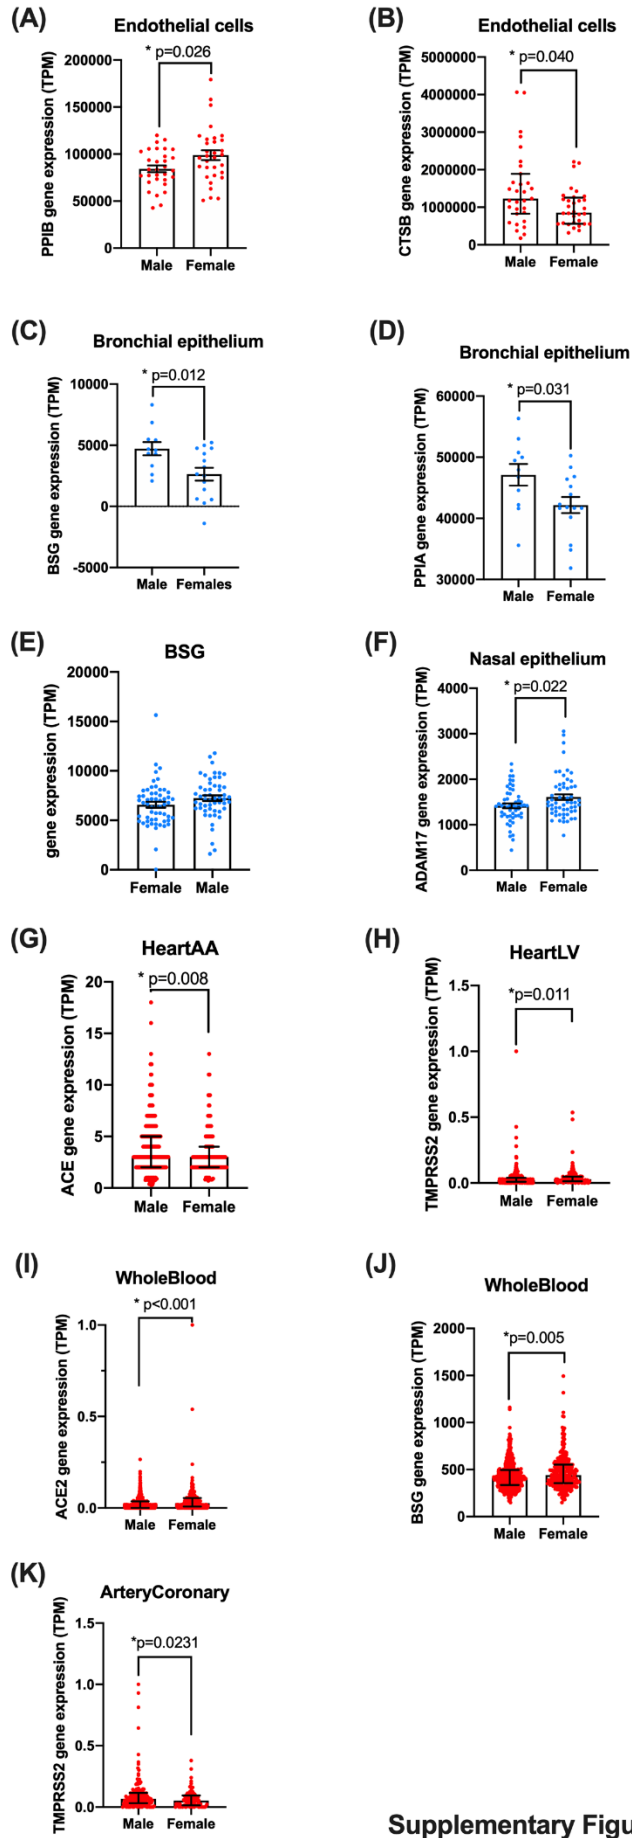

Supplementary Figure 5



**Supplementary Table 1. Identified cell studies.** Raw transcriptomic gene expression profiling datasets were obtained from ArrayExpress and NCBI GEO for blood outgrowth endothelial cells (BOECs; also known as ‘late outgrowth endothelial cells’), peripheral blood mononuclear cells (PBMCs) and bronchial airway (obtained from bronchial brushing) and nasal (obtained nasal brushing) epithelium.

| Cell type                                          | Study ID  | n  | Gender (Male; % total) | Age (<40; % total) | Age (mean $\pm$ SD) | Data source weblink                                                                                                                     |
|----------------------------------------------------|-----------|----|------------------------|--------------------|---------------------|-----------------------------------------------------------------------------------------------------------------------------------------|
| <b>BOECs</b><br>(late outgrowth endothelial cells) | GEOD9877  | 27 | 12 (44%)               | 18 (67%)           | 38.1 $\pm$ 12.8     | <a href="https://www.ebi.ac.uk/arrayexpress/experiments/E-GEOD-9877/">https://www.ebi.ac.uk/arrayexpress/experiments/E-GEOD-9877/</a>   |
|                                                    | GEOD22688 | 33 | 18 (55%)               | 32 (97%)           | 25.0 $\pm$ 4.8      | <a href="https://www.ebi.ac.uk/arrayexpress/experiments/E-GEOD-22688/">https://www.ebi.ac.uk/arrayexpress/experiments/E-GEOD-22688/</a> |
|                                                    | GEOD38961 | 3  | 1 (33%)                | 2 (66%)            | 35.7 $\pm$ 14.2     | <a href="https://www.ebi.ac.uk/arrayexpress/experiments/E-GEOD-38961/">https://www.ebi.ac.uk/arrayexpress/experiments/E-GEOD-38961/</a> |
| <b>PBMCs</b><br>(whole blood derived)              | GEOD49641 | 18 | 10 (56%)               | 1 (0.06%)          | 60.4 $\pm$ 10.5     | <a href="https://www.ebi.ac.uk/arrayexpress/experiments/E-GEOD-49641/">https://www.ebi.ac.uk/arrayexpress/experiments/E-GEOD-49641/</a> |
|                                                    | GEOD17114 | 14 | 7 (50%)                | 9 (64%)            | 36.7 $\pm$ 13.5     | <a href="https://www.ebi.ac.uk/arrayexpress/experiments/E-GEOD-17114/">https://www.ebi.ac.uk/arrayexpress/experiments/E-GEOD-17114/</a> |
|                                                    | GEOD6645  | 4  | 4 (100%)               | 0 (0%)             | 58.3 $\pm$ 3.1      | <a href="https://www.ncbi.nlm.nih.gov/geo/query/acc.cgi?acc=GSE66465">https://www.ncbi.nlm.nih.gov/geo/query/acc.cgi?acc=GSE66465</a>   |
|                                                    | MEXP1635  | 9  | 0 (0%)                 | 5 (55%)            | 43.1 $\pm$ 14.9     | <a href="https://www.ebi.ac.uk/arrayexpress/experiments/E-MEXP-1635/">https://www.ebi.ac.uk/arrayexpress/experiments/E-MEXP-1635/</a>   |
|                                                    | GEOD38958 | 35 | 24 (69%)               | 0 (0%)             | 69.3 $\pm$ 9.3      | <a href="https://www.ebi.ac.uk/arrayexpress/experiments/E-GEOD-38958/">https://www.ebi.ac.uk/arrayexpress/experiments/E-GEOD-38958/</a> |
|                                                    | EMTAB6531 | 4  | 1 (25%)                | 0 (0%)             | 55.3 $\pm$ 2.5      | <a href="https://www.ebi.ac.uk/arrayexpress/experiments/E-MTAB-6531/">https://www.ebi.ac.uk/arrayexpress/experiments/E-MTAB-6531/</a>   |
| <b>Nasal</b><br>(scrapings/brushings)              | GEOD11348 | 31 | 11 (35%)               | 31 (100%)          | 21.0 $\pm$ 1.5      | <a href="https://www.ebi.ac.uk/arrayexpress/experiments/E-GEOD-11348/">https://www.ebi.ac.uk/arrayexpress/experiments/E-GEOD-11348/</a> |
|                                                    | EMATB4015 | 54 | 32 (59%)               | 0 (0%)             | 55.5 $\pm$ 7        | <a href="https://www.ebi.ac.uk/arrayexpress/experiments/E-MTAB-4015/">https://www.ebi.ac.uk/arrayexpress/experiments/E-MTAB-4015/</a>   |
|                                                    | GEOD16008 | 26 | 11 (42%)               | 18 (69%)           | 33.5 $\pm$ 10.6     | <a href="https://www.ebi.ac.uk/arrayexpress/experiments/E-GEOD-16008/">https://www.ebi.ac.uk/arrayexpress/experiments/E-GEOD-16008/</a> |
| <b>Bronchial</b><br>(brushings)                    | GEOD16008 | 26 | 11 (42%)               | 18 (69%)           | 33.8 $\pm$ 10.4     | <a href="https://www.ebi.ac.uk/arrayexpress/experiments/E-GEOD-16008/">https://www.ebi.ac.uk/arrayexpress/experiments/E-GEOD-16008/</a> |
|                                                    | GEOD19667 | 48 | NA                     | 26 (54%)           | 39.1 $\pm$ 13.6     | <a href="https://www.ebi.ac.uk/arrayexpress/experiments/E-GEOD-19667/">https://www.ebi.ac.uk/arrayexpress/experiments/E-GEOD-19667/</a> |
